# Supplementary material for: The Liver Maximum Capacity Test (LiMAx) Is Associated with Short-Term Survival in Patients with Early Stage HCC Undergoing Transarterial Treatment
Source: MDPI journal article supplement (doi:10.3390/cancers14215323), 2022-10-28
Supplement: s1 [file s1]

## **Supplementary Materials**

### **The liver maximum function capacity test (LiMAx) is associated with short-term survival in patients with early stage HCC undergoing transarterial treatment**

Janett Fischer, Stella Wellhöner, Sebastian Ebel, Thomas Lincke, Albrecht Böhlig, Florian Gerhardt, Rhea Veelken, Holger Gößmann, Karen Geva Steinhoff, Timm Denecke, Osama Sabri, Thomas Berg, Florian van Bömmel

#### **Table of contents**

##### **Supplementary Results**

|                |   |
|----------------|---|
| Table S1 ..... | 2 |
| Table S2 ..... | 3 |
| Table S3 ..... | 4 |
| Table S4 ..... | 5 |
| Table S5 ..... | 5 |
| Table S6 ..... | 6 |
| Table S7 ..... | 6 |

**Table S1: Changes in LiMAx, laboratory parameters and liver function scores according Child A and Child B group.** All values presented as median (range).

| Parameter                       | Child A (n=29)      |                     |         | Child B (n=5)       |                     |         | Child A vs. Child B (p value) |                       |
|---------------------------------|---------------------|---------------------|---------|---------------------|---------------------|---------|-------------------------------|-----------------------|
|                                 | Before TACE/TARE    | After TACE/TARE     | p value | Before TACE/TARE    | After TACE/TARE     | p value | Before TACE/TARE              | After TACE/TARE       |
| LiMAx (µg/kg/h)                 | 229 (87-686)        | 261 (53-604)        | 0.018   | 181 (35-282)        | 84 (60-228)         | 0.625   | 0.292                         | 0.010                 |
| ALT (µkat/L)                    | 0.58 (0.23-1.03)    | 0.46 (0.25-12.58)   | 0.081   | 0.63 (0.52-0.68)    | 0.59 (0.25-0.79)    | 1.000   | 0.370                         | 0.227                 |
| AST (µkat/L)                    | 0.74 (0.37-12.70)   | 0.71 (0.28-12.93)   | 0.250   | 1.12 (0.61-1.58)    | 1.26 (0.49-1.56)    | 0.625   | 0.026                         | 0.092                 |
| GGT (µkat/L)                    | 2.39 (0.42-6.95)    | 2.17 (0.58-7.45)    | 0.571   | 2.99 (1.43-10.53)   | 2.90 (0.90-6.09)    | 0.125   | 0.444                         | 0.737                 |
| Bilirubin (µmol/L)              | 13.8 (4.8-34.1)     | 16.6 (5.5-44.6)     | 0.421   | 17.9 (7.1-87.8)     | 35.2 (6.9-70.8)     | 0.625   | 0.154                         | 0.055                 |
| Platelets (x10 <sup>9</sup> /L) | 133 (51-221)        | 120 (40-240)        | 0.741   | 109 (74-144)        | 123 (74-145)        | 1.000   | 0.611                         | 0.780                 |
| Albumin (g/L)                   | 40.9 (31.7-46.6)    | 40.4 (21.7-47.0)    | 0.003   | 36.1 (28.5-39.5)    | 31.2 (25.2-36.1)    | 0.063   | 0.011                         | 0.004                 |
| INR                             | 1.2 (0.9-1.9)       | 1.2 (0.9-1.9)       | 0.717   | 1.2 (1.0-1.5)       | 1.3 (1.0-1.4)       | 1.000   | 0.698                         | 0.383                 |
| Creatinine (µmol/L)             | 77 (32-93)          | 70 (29-109)         | 0.577   | 86 (61-124)         | 73 (60-135)         | 1.000   | 0.167                         | 0.300                 |
| ALBI score                      | -2.76 (-3.38--1.77) | -2.58 (-3.20--0.92) | 0.0007  | -1.95 (-2.53--1.44) | -1.87 (-1.99--1.25) | 0.125   | 0.008                         | 0.0008                |
| CTP score                       | 5 (5-6)             | 5 (5-7)             | 0.563   | 7 (7-7)             | 7 (7-7)             | 1.000   | 3.95x10 <sup>-6</sup>         | 2.16x10 <sup>-5</sup> |
| MELD score                      | 8 (6-15)            | 8 (6-15)            | 0.243   | 10 (8-18)           | 13 (10-16)          | 0.813   | 0.027                         | 0.003                 |

The Mann–Whitney U-test and Wilcoxon signed-rank test were applied to compare the quantitative variables. ALT: alanine aminotransferase, AST: aspartate aminotransferase, CTP: Child-Turcotte-Pugh, GGT: gamma-glutamyl transpeptidase, LiMAx: liver maximum capacity test, INR: international normalized ratio, TACE: transarterial chemoembolization, TARE: transarterial radioembolization

**Table S2: Changes in LiMAx, laboratory parameters and liver function scores according ALBI grade 1 and ALBI grade 2/3 group.**

All values presented as median (range).

| Parameter                       | ALBI grade 1 (n=22)     |                     |            | ALBI grade 2/3 (n=14)   |                         |            | ALBI grade 1 vs. ALBI grade 2/3 (p value) |                        |
|---------------------------------|-------------------------|---------------------|------------|-------------------------|-------------------------|------------|-------------------------------------------|------------------------|
|                                 | Before<br>TACE/TARE     | After<br>TACE/TARE  | p<br>value | Before<br>TACE/TARE     | After<br>TACE/TARE      | p<br>value | Before<br>TACE/TAR<br>E                   | After<br>TACE/TAR<br>E |
| LiMAx (µg/kg/h)                 | 276 (156-686)           | 316 (53-604)        | 0.168      | 173 (35-282)            | 192 (60-283)            | 0.414      | 0.0001                                    | 0.0002                 |
| ALT (µkat/L)                    | 0.55 (0.23-1.01)        | 0.42 (0.25-12.58)   | 0.468      | 0.63 (0.38-1.03)        | 0.54 (0.25-0.79)        | 0.185      | 0.090                                     | 0.178                  |
| AST (µkat/L)                    | 0.62 (0.38-1.07)        | 0.55 (0.28-12.93)   | 0.962      | 0.96 (0.56-1.58)        | 0.79 (0.49-1.56)        | 0.223      | 0.0001                                    | 0.016                  |
| GGT (µkat/L)                    | 2.14 (0.44-5.21)        | 1.93 (0.71-7.45)    | 0.732      | 2.95 (0.44-10.53)       | 3.05 (0.58-7.02)        | 0.122      | 0.299                                     | 0.243                  |
| Bilirubin (µmol/L)              | 19.7 (4.8-23.2)         | 14.4 (4.9-44.6)     | 0.156      | 21.6 (7.1-87.8)         | 21.5 (6.9-70.8)         | 0.867      | 0.0008                                    | 0.002                  |
| Platelets (x10 <sup>9</sup> /L) | 149 (51-265)            | 138 (40-225)        | 0.168      | 102 (55-221)            | 108 (58-240)            | 0.021      | 0.130                                     | 0.555                  |
| Albumin (g/L)                   | 43.4 (39.0-48.0)        | 42.7 (236.2-48.3)   | 0.109      | 36.0 (28.5-39.5)        | 34.5 (21.7-37.1)        | 0.003      | 6.06x10 <sup>-9</sup>                     | 6.85x10 <sup>-9</sup>  |
| INR                             | 1.1 (0.9-1.4)           | 1.1 (0.9-1.9)       | 0.546      | 1.2 (1.0-1.9)           | 1.3 (1.0-1.6)           | 0.797      | 0.088                                     | 0.058                  |
| Creatinine<br>(µmol/L)          | 79 (48-95)              | 72 (40-109)         | 0.231      | 78 (32-124)             | 71 (29-135)             | 0.841      | 0.892                                     | 0.917                  |
| ALBI score                      | -2.96 (-3.40--<br>2.63) | -2.85 (-3.39--2.25) | 0.033      | -2.25 (-2.53--<br>1.44) | -1.97 (-2.39--<br>0.92) | 0.004      | 5.27x10 <sup>-10</sup>                    | 2.11x10 <sup>-9</sup>  |
| CTP score                       | 5 (5-6)                 | 5 (5-7)             | 0.312      | 6 (5-7)                 | 5 (5-7)                 | 1.000      | 0.002                                     | 0.121                  |
| MELD score                      | 8 (6-10)                | 8 (6-15)            | 0.073      | 10 (7-18)               | 11 (7-16)               | 0.920      | 0.002                                     | 0.014                  |

The Mann–Whitney U-test and Wilcoxon signed-rank test were applied to compare the quantitative variables. ALT: alanine aminotransferase, AST: aspartate aminotransferase, CTP: Child-Turcotte-Pugh, GGT: gamma-glutamyl transpeptidase, LiMAx: liver maximum capacity test, INR: international normalized ratio, TACE: transarterial chemoembolization, TARE: transarterial radioembolization

**Table S3: Changes in LiMAx, laboratory parameters and liver function scores according LiMAx ≤150 µg/kg/h and LiMAx >150 µg/kg/h levels. All values presented as median (range).**

| Parameter                       | LiMAx ≤150 µg/kg/h (n=5) |                     |         | LiMAx >150 µg/kg/h (n=31) |                     |         | LiMAx ≤150 vs. LiMAx >150 µg/kg/h (p value) |                    |
|---------------------------------|--------------------------|---------------------|---------|---------------------------|---------------------|---------|---------------------------------------------|--------------------|
|                                 | Before<br>TACE/TARE      | After<br>TACE/TARE  | p value | Before<br>TACE/TARE       | After<br>TACE/TARE  | p value | Before<br>TACE/TARE                         | After<br>TACE/TARE |
| LiMAx (µg/kg/h)                 | 92 (35-115)              | 165 (60-261)        | 0.063   | 266 (156-686)             | 272 (53-604)        | 0.223   | 8.60x10 <sup>-7</sup>                       | 0.028              |
| ALT (µkat/L)                    | 0.65 (0.53-0.68)         | 0.51 (0.41-0.75)    | 0.438   | 0.56 (0.23-1.03)          | 0.46 (0.25-12.58)   | 0.301   | 0.143                                       | 0.449              |
| AST (µkat/L)                    | 1.09 (0.73-1.58)         | 0.78 (0.72-1.53)    | 0.613   | 0.81 (0.38-1.17)          | 0.64 (0.28-12.93)   | 0.758   | 0.021                                       | 0.122              |
| GGT (µkat/L)                    | 1.97 (0.42-3.54)         | 2.06 (0.58-6.95)    | 0.316   | 2.90 (0.38-10.53)         | 2.23 (0.71-7.44)    | 0.413   | 0.261                                       | 0.554              |
| Bilirubin (µmol/L)              | 34.1 (31.4-87.8)         | 30.9 (15.5-70.8)    | 0.438   | 13.5 (4.8-26.0)           | 15.6 (4.9-44.6)     | 0.117   | 2.64x10 <sup>-6</sup>                       | 0.002              |
| Platelets (x10 <sup>9</sup> /L) | 89 (55-180)              | 92 (53-173)         | 1.000   | 140 (51-265)              | 136 (40-240)        | 0.637   | 0.162                                       | 0.229              |
| Albumin (g/L)                   | 35.7 (31.9-38.3)         | 34.7 (21.7-37.9)    | 0.063   | 41.0 (28.5-48.0)          | 40.6 (25.2-48.3)    | 0.007   | 0.006                                       | 0.010              |
| INR                             | 1.3 (1.1-1.8)            | 1.3 (1.1-1.6)       | 0.500   | 1.1 (0.9-1.9)             | 1.1 (0.9-1.9)       | 0.470   | 0.041                                       | 0.116              |
| Creatinine (µmol/L)             | 81 (32-109)              | 80 (29-110)         | 0.500   | 79 (48-124)               | 71 (40-135)         | 0.335   | 0.976                                       | 0.849              |
| ALBI score                      | -2.01 (-2.26--1.44)      | -1.91 (-2.44--0.92) | 0.063   | -2.83 (-3.40--1.61)       | -2.71 (-3.39--1.25) | 0.003   | 4.40x10 <sup>-4</sup>                       | 0.001              |
| CTP score                       | 6 (5-7)                  | 5 (5-7)             | 0.500   | 5 (5-7)                   | 5 (5-7)             | 0.359   | 0.095                                       | 0.763              |
| MELD score                      | 13 (8-18)                | 13 (8-16)           | 0.312   | 8 (6-15)                  | 9 (6-15)            | 0.059   | 0.001                                       | 0.021              |

The Mann–Whitney U-test and Wilcoxon signed-rank test were applied to compare the quantitative variables. ALT: alanine aminotransferase, AST: aspartate aminotransferase, CTP: Child-Turcotte-Pugh, GGT: gamma-glutamyl transpeptidase, LiMAx: liver maximum capacity test, INR: international normalized ratio, TACE: transarterial chemoembolization, TARE: transarterial radioembolization.

**Table S4.** Adverse events within 4 weeks after transarterial treatment.

| Adverse effect         | Number (%)  |             |
|------------------------|-------------|-------------|
|                        | TARE (n=12) | TACE (n=57) |
| Mental confusion       | 0           | 2 (3.5%)    |
| Fatigue                | 0           | 8 (14.0%)   |
| Epigastric pressure    | 2 (16.7%)   | 3 (5.3%)    |
| Abdominal fullness     | 0           | 2 (3.5%)    |
| Flatulence             | 0           | 3 (5.3%)    |
| Diarrhea               | 0           | 3 (5.3%)    |
| Pruritus               | 2 (16.7%)   | 2 (3.5%)    |
| Ascites                |             |             |
| Mild to moderate       | 1 (8.3%)    | 2 (3.5%)    |
| Severe                 | 0           | 5 (8.8%)    |
| Hepatic encephalopathy | 0           | 2 (3.5%)    |
| Kidney failure         | 0           | 2 (3.5%)    |
| Liver failure          | 0           | 1 (1.8%)    |
| Myocardial infarct     |             | 1 (1.8%)    |
| Death                  |             | 2 (3.5%)    |
| Lost to follow up      |             | 1 (1.8%)    |

**Table S5: Univariate and multivariate logistic regression analyses for the occurrence of adverse events.**

| Parameter                            | Univariate analysis |       |                          |              | Multivariate analysis |       |                   |         |
|--------------------------------------|---------------------|-------|--------------------------|--------------|-----------------------|-------|-------------------|---------|
|                                      | RC                  | SE    | OR (95% CI)              | p value      | RC                    | SE    | OR (95% CI)       | p value |
| LiMAx $\leq 150$ $\mu\text{g/kg/h}$  | 1.197               | 0.702 | 3.31 (0.84-13.11)        | 0.088        | 1.240                 | 1.210 | 3.46 (0.32-37.27) | 0.307   |
| Male sex                             | 0.367               | 0.590 | 1.44 (0.45-4.59)         | 0.534        |                       |       | -                 |         |
| Age (years)                          | 0.020               | 0.028 | 1.02 (0.98-1.07)         | 0.474        |                       |       | -                 |         |
| CTP score                            | 0.776               | 0.357 | <b>2.15 (1.07-4.33)</b>  | <b>0.032</b> | 0.452                 | 0.460 | 1.57 (0.64-3.84)  | 0.320   |
| MELD                                 | 0.121               | 0.082 | 1.13 (0.93-1.33)         | 0.143        |                       |       | -                 |         |
| ALBI score                           | 1.005               | 0.508 | <b>2.73 (1.01-7.40)</b>  | <b>0.048</b> | -1.539                | 5.040 | 0.22 (0-4165.97)  | 0.760   |
| ALT ( $\mu\text{kat/L}$ )            | 1.043               | 0.912 | 2.84 (0.48-16.94)        | 0.252        |                       |       | -                 |         |
| AST ( $\mu\text{kat/L}$ )            | 1.762               | 0.858 | <b>5.83 (1.08-31.98)</b> | <b>0.040</b> | 1.460                 | 1.310 | 4.31 (0.33-55.97) | 0.264   |
| GGT ( $\mu\text{kat/L}$ )            | -0.970              | 0.115 | 0.91 (0.72-1.14)         | 0.400        |                       |       | -                 |         |
| Bilirubin ( $\mu\text{mol/L}$ )      | 0.041               | 0.021 | 1.04 (1.00-1.09)         | 0.050        | 0.002                 | 0.070 | 1.00 (0.87-1.16)  | 0.973   |
| Platelets ( $\times 10^9/\text{L}$ ) | -0.002              | 0.004 | 1.00 (0.99-1.01)         | 0.641        |                       |       | -                 |         |
| Albumin (g/L)                        | -0.092              | 0.054 | 0.91 (0.82-1.01)         | 0.085        | -0.122                | 0.450 | 0.89 (0.37-2.14)  | 0.788   |
| INR                                  | 1.239               | 1.216 | 3.45 (0.32-37.44)        | 0.308        |                       |       | -                 |         |
| Creatinine ( $\mu\text{mol/L}$ )     | -0.003              | 0.009 | 1.00 (0.98-1.01)         | 0.738        |                       |       | -                 |         |
| BCLC Score                           |                     |       |                          |              |                       |       |                   |         |
| A                                    |                     |       | REF                      |              |                       |       | -                 |         |
| B                                    | -0.118              | 0.521 | 0.89 (0.32-2.47)         | 0.821        |                       |       | -                 |         |
| C                                    | 1.620               | 1.129 | 5.06 (0.55-46.24)        | 0.151        |                       |       | -                 |         |
| Treatment                            |                     |       |                          |              |                       |       |                   |         |
| TACE                                 | 0.099               | 0.646 | 1.10 (0.31-3.92)         | 0.878        |                       |       | -                 |         |
| TARE                                 |                     |       | REF                      |              |                       |       | -                 |         |

ALBI: albumin-bilirubin, ALT: alanine aminotransferase, AST: aspartate aminotransferase, BCLC: Barcelona Clinic Liver Cancer score, CI: confidence interval, CTP: Child-Turcotte-Pugh, GGT: gamma-glutamyl transpeptidase, LiMAx: liver maximum capacity test, HR: hazard ratio, INR: international normalized ratio,

MELD: model for end-stage liver disease, RC: regression coefficient, REF: reference, SE: standard error, TACE: transarterial chemoembolization, TARE: transarterial radioembolization

**Table S6: Univariate and multivariate Cox regression analyses for overall survival.**

| Parameter          | Univariate analysis |       |                            |                             | Multivariate analysis |              |                            |              |
|--------------------|---------------------|-------|----------------------------|-----------------------------|-----------------------|--------------|----------------------------|--------------|
|                    | RC                  | SE    | HR (95% CI)                | p value                     | RC                    | SE           | HR (95% CI)                | p value      |
| LiMAx ≤150 µg/kg/h | 0.502               | 0.430 | 1.65 (0.71-3.84)           | 0.243                       |                       |              | -                          |              |
| Male sex           | 0.147               | 0.500 | 1.16 (0.44-3.09)           | 0.769                       |                       |              | -                          |              |
| Age (years)        | -0.047              | 0.026 | 0.95 (0.91-1.01)           | 0.074                       | -0.015                | 0.030        | 0.99 (0.93-1.04)           | 0.605        |
| CTP Child A        |                     |       | REF                        |                             |                       |              | REF                        |              |
| Child B            | 1.070               | 0.424 | <b>2.93 (1.27-6.76)</b>    | <b>0.012</b>                | 0.317                 | 0.582        | 1.37 (0.44-4.30)           | 0.586        |
| MELD               | 0.161               | 0.058 | <b>1.17 (1.05-1.31)</b>    | <b>0.005</b>                | <b>0.142</b>          | <b>0.072</b> | <b>1.15 (1.00-1.33)</b>    | <b>0.048</b> |
| ALBI score         | 1.120               | 0.368 | <b>3.10 (1.51-6.37)</b>    | <b>0.002</b>                |                       |              |                            |              |
| Grade 1            |                     |       | REF                        |                             |                       |              | REF                        |              |
| Grade 2            | 0.950               | 0.458 | <b>2.58 (1.05-6.34)</b>    | <b>0.038</b>                | 0.133                 | 0.557        | 1.14 (0.38-3.41)           | 0.812        |
| Grade 3            | 3.921               | 0.932 | <b>50.43 (8.12-313.06)</b> | <b>2.57x10<sup>-5</sup></b> | <b>2.881</b>          | <b>1.110</b> | <b>17.83 (2.02-157.11)</b> | <b>0.009</b> |
| BCLC Score         |                     |       |                            |                             |                       |              |                            |              |
| A                  |                     |       | REF                        |                             |                       |              | -                          |              |
| B                  | 0.160               | 0.428 | 1.17 (0.51-2.71)           | 0.708                       |                       |              | -                          |              |
| C                  | 0.219               | 0.652 | 1.25 (0.35-4.47)           | 0.737                       |                       |              | -                          |              |
| Treatment          |                     |       |                            |                             |                       |              |                            |              |
| TACE               | -0.547              | 0.512 | 0.58 (0.21-1.58)           | 0.264                       |                       |              | -                          |              |
| TARE               |                     |       | REF                        |                             |                       |              | -                          |              |

ALBI: albumin-bilirubin, BCLC: Barcelona Clinic Liver Cancer score, CI: confidence interval, CTP: Child-Turcotte-Pugh, LiMAx: liver maximum capacity test, HR: hazard ratio, ratio, MELD: model for end-stage liver disease, RC: regression coefficient, REF: reference, SE: standard error, TACE: transarterial chemoembolization, TARE: transarterial radioembolization

**Table S7: Univariate and multivariate Cox regression analyses for 180-day survival in patients with BCLC stage A.**

| Parameter          | Univariate analysis |         |                            |              | Multivariate analysis |              |                         |              |
|--------------------|---------------------|---------|----------------------------|--------------|-----------------------|--------------|-------------------------|--------------|
|                    | RC                  | SE      | HR (95% CI)                | p value      | RC                    | SE           | HR (95% CI)             | p value      |
| LiMAx ≤150 µg/kg/h | 2.710               | 1.120   | <b>15.03 (1.67-134.94)</b> | <b>0.016</b> | 0.608                 | 1.786        | 1.84 (0.01-60.85)       | 0.733        |
| Male sex           | 3.652               | 3.969   | 38.57 (0.02-92240)         | 0.357        |                       |              | -                       |              |
| Age (years)        | -0.094              | 0.063   | 0.91(0.80-1.03)            | 0.136        |                       |              | -                       |              |
| CTP Child A        |                     |         | REF                        |              |                       |              | -REF                    |              |
| Child B            | 2.667               | 1.120   | <b>14.39 (1.60-129.21)</b> | <b>0.017</b> | 2.425                 | 1.657        | 11.30 (0.44-290.58)     | 0.143        |
| MELD               | 0.405               | 0.134   | <b>1.50 (1.15-1.95)</b>    | <b>0.003</b> | <b>0.489</b>          | <b>0.219</b> | <b>1.63 (1.06-2.51)</b> | <b>0.026</b> |
| ALBI score         | 2.767               | 0.998   | <b>15.91 (2.25-112.45)</b> | <b>0.006</b> | 1.899                 | 1.911        | 6.68 (0.16-282.63)      | 0.320        |
| Grade 1            |                     |         | REF                        |              |                       |              |                         |              |
| Grade 2            | 11.330              | 171.011 | 0                          | 0.947        |                       |              | -                       |              |
| Grade 3            | 13.881              | 171.012 | 0                          | 0.935        |                       |              | -                       |              |
| Treatment          |                     |         |                            |              |                       |              |                         |              |
| TACE               | 3.161               | 6.540   | 23.61 (0-870987)           | 0.629        |                       |              | -                       |              |
| TARE               |                     |         | REF                        |              |                       |              | -                       |              |

ALBI: albumin-bilirubin, BCLC: Barcelona Clinic Liver Cancer score, CI: confidence interval, CTP: Child-Turcotte-Pugh, LiMAx: liver maximum capacity test, HR: hazard ratio, MELD: model for end-stage liver disease, RC: regression coefficient, REF: reference, SE: standard error, TACE: transarterial chemoembolization, TARE: transarterial radioembolization
